# Supplementary material for: Microbiome Analysis of Malacopathogenic Nematodes Suggests No Evidence of a Single Bacterial Symbiont Responsible for Gastropod Mortality
Source: PubMed Central journal article supplement (PMC9065361; doi:10.3389/fimmu.2022.878783), 2022-04-20
Supplement: DataSheet_1.pdf [file DataSheet_1.pdf]

1  
Cultures\_con GGC GGACGGG TGAGTAATAC TTAGGAACTT ACCTAGTAGT GGGGGATAGC TCGGGGAAAC  
Psychrobacter\_faecalis GGC GGACGGG TGAGTAATAC TTAGGAACTT ACCTAGTAGT GGGGGATAGC TCGGGGAAAC  
Moraxella\_osloensis GGC GGACGGG TGAGTAACAT TTAGGAACTT ACCTAGTAGT GGGGGATAGC TCGGGGAAAC

61  
Cultures\_con TCGAATTAAT ACCGCATACG ACCTACGGGA GAAAGGGG-- GCAACTTGTGTT GCTCTCGCTA  
Psychrobacter\_faecalis TCGAATTAAT ACCGCATACG ACCTACGGGA GAAAGGGG-- GCAACTTGTGTT GCTCTCGCTA  
Moraxella\_osloensis TCGAATTAAT ACCGCATACG ACCTACGGGT GAAAGGGGGC GCAA----- GCTCTTGTCTA

121  
Cultures\_con TTAGATGAGC CTAAGTCGGA TTAGCTAGAT GGTGGGGTAA AGGCCATCCA TGGCGACGAT  
Psychrobacter\_faecalis TTAGATGAGC CTAAGTCGGA TTAGCTAGAT GGTGGGGTAA AGGCCATCCA TGGCGACGAT  
Moraxella\_osloensis TTAGATGAGC CTAATACTAGA TTAGCTAGATT GGTGGGGTAA AGGCCATCCA TGGCGACGAT

181  
Cultures\_con CTGTAGCTGG TCTGAGAGGA TGATCAGCCA CACCGGGACT GAGACACGGC CCGGACTCCT  
Psychrobacter\_faecalis CTGTAGCTGG TCTGAGAGGA TGATCAGCCA CACCGGGACT GAGACACGGC CCGGACTCCT  
Moraxella\_osloensis CTGTAAGCTGG TCTGAGAGGA TGATCAGTCA CACCGGAACT GAGACACGGT CCGGACTCCT

241  
Cultures\_con ACGGGAGGCA GCAGTGGGGA ATATTGGACA ATGGGGGCAA CCCTGATCCA GCCATGCCGC  
Psychrobacter\_faecalis ACGGGAGGCA GCAGTGGGGA ATATTGGACA ATGGGGGCAA CCCTGATCCA GCCATGCCGC  
Moraxella\_osloensis ACGGGAGGCA GCAGTGGGGA ATATTGGACA ATGGGGGCAA CCCTGATCCA GCCATGCCGC

301  
Cultures\_con GTGTGTGAAG AAGGCCTTTT GGTGTGTAAG CACTTTAAGC AGTGAAGAAG ACTCCCATGG  
Psychrobacter\_faecalis GTGTGTGAAG AAGGCCTTTT GGTGTGTAAG CACTTTAAGC AGTGAAGAAG ACTCC-ATGG  
Moraxella\_osloensis GTGTGTGAAG AAGGCCTTTT GGTGTGTAAG CACTTTAAGC AG-GGAGGAG AGGCTAATGG

361  
Cultures\_con TTTAATAACCC ATGGACGATG ACATTAGCTG CAGAATAAGC ACCGGCTAAC TCTGTGCCA  
Psychrobacter\_faecalis -TTAATAACCC ATGGACGATG ACATTAGCTG CAGAATAAGC ACCGGCTAAC -TCTGTGCCA  
Moraxella\_osloensis -TTAATAACCC ATTAGATTAG ACGTTACCTG CAGAATAAGC ACCGGCTAAC -TCTGTGCCA

421  
Cultures\_con GCAGCCGCGG TAATACAGAG GGTGCAAGCG TTAATCGGAA TTACTGGGCG TAAAGCGAGC  
Psychrobacter\_faecalis GCAGCCGCGG TAATACAGAG GGTGCAAGCG TTAATCGGAA TTACTGGGCG TAAAGCGAGC  
Moraxella\_osloensis GCAGCCGCGG TAATACAGAG GGTGCGAGCG TTAATCGGAA TTACTGGGCG TAAAGCGAGT

481  
Cultures\_con GTAGGTGGCT TGATAAGTCA GATGTGAAAG CCCCGGGCTT AACCTGGGAA CGGCATCTGA  
Psychrobacter\_faecalis GTAGGTGGCT TGATAAGTCA GATGTGAAAG CCCCGGGCTT AACCTGGGAA CGGCATCTGA  
Moraxella\_osloensis GTAGGTGGCT CATTAAGTCA CATGTGAAAT CCCCGGGCTT AACCTGGGAA CTGCATGTGA

541  
Cultures\_con TACTGTTAG- GCTAGAGTAG GTGAGAGGAA GGTAGAATTC CAGGTGTAGC GGTGAAATGC  
Psychrobacter\_faecalis TACTGTTAG- GCTAGAGTAG GTGAGAGGAA GGTAGAATTC CAGGTGTAGC GGTGAAATGC  
Moraxella\_osloensis TACTGGTGGT GCTAGAAATAT GTGAGAGGGA AGTAGAATTC CAGGTGTAGC GGTGAAATGC

601  
Cultures\_con GTAGAGATCT GGAGGAATAC CGATGGCGAA GGCAGCCTTC TGGCATCATA CTGACACTGA  
Psychrobacter\_faecalis GTAGAGATCT GGAGGAATAC CGATGGCGAA GGCAGCCTTC TGGCATCATA CTGACACTGA  
Moraxella\_osloensis GTAGAGATCT GGAGGAATAC CGATGGCGAA GGCAGCCTTC TGGCATCATA TTTGACACTGA

661  
Cultures\_con GGTTGAAAG CGTGGGTAGC AAACAGGATT AGATACCCCTG GTAGTCCACG CCGTAAACGA  
Psychrobacter\_faecalis GGTTGAAAG CGTGGGTAGC AAACAGGATT AGATACCCCTG GTAGTCCACG CCGTAAACGA  
Moraxella\_osloensis GATTCGAAAG CGTGGGTAGC AAACAGGATT AGATACCCCTG GTAGTCCACG CCGTAAACGA

721  
Cultures\_con TGTCTACTAG TCGTTGGGTC CCTTGAGGAC TTAGTGTACGC AGCTAACGCA ATAAGTAGAC  
Psychrobacter\_faecalis TGTCTACTAG TCGTTGGGTC CCTTGAGGAC TTAGTGTACGC AGCTAACGCA ATAAGTAGAC  
Moraxella\_osloensis TGTCTACTAG CCGTTGGGGT CCTTGAGACT TTAGTGGGCG AGTTAACGCG ATAAGTAGAC

781  
Cultures\_con CGCCTGGGGG AGTACGGCCG CAAGGTTAAA ACTCAAATGA AATTGACGGG GGGCCCGCAC  
Psychrobacter\_faecalis CGCCTGGGGG AGTACGGCCG CAAGGTTAAA ACTCAAATG- AATTGAC-GG GGGCCCGCAC  
Moraxella\_osloensis CGCCTGGGGG AGTACGGCCG CAAGGTTAAA ACTCAAATG- AATTGAC-GG GGGCCCGCAC

841  
Cultures\_con AAGCGGTGG- AGCATGTGGT TTAATTCGAT GCAACGCGAA GAAACCTTAC CTGGGTCTTG  
Psychrobacter\_faecalis AAGCGGTGG- AGCATGTGGT TTAATTCGAT GCAACGCGAA G-AAACCTTAC CT-GGTCTTG  
Moraxella\_osloensis AAGCGGTGG- AGCATGTGGT TTAATTCGAT GCAACGCGAA G-AAACCTTAC CT-GGTCTTG

901  
Cultures\_con ACATATCTAG AAATCCTGCA GAGAA TGGG AGTGGCCTTC CGGGAATTA GAAATACAGG  
Psychrobacter\_faecalis ACATATCTAG -AATCCTGCA GAGA-TGGG GAGTGCCTTC --GGGAATTA -GAATACA-G  
Moraxella\_osloensis ACATAGTGAG -AATCCTGCA GAGA-TGGG GAGTGCCTTC --GGGAATTC -ACATACA-G

961  
Cultures\_con GTGCTTGCAT GGCTGTGTC AGCTCGTGTG GTGAGATG-T GGGTTAAGTC CCGCAACGAG  
Psychrobacter\_faecalis GTGC-TGCAT GGCTGTGTC AGCTCGTGTG GTGAGATGTT GGGTTAAGTC CCGCAACGAG  
Moraxella\_osloensis GTGC-TGCAT GGCTGTGTC AGCTCGTGTG GTGAGATGTT GGGTTAAGTC CCGCAACGAG

1021  
Cultures\_con CGCAACCCTT GTCCTTAGTT ACCAGCGGTT TTGGCCGGGA ACTCTAAGGA TACTGCCAGT  
Psychrobacter\_faecalis CGCAACCCTT GTCCTTAGTT ACCAGCGGTT T-GGCCGGGA ACTCTAAGGA TACTGCCAGT  
Moraxella\_osloensis CGCAACCCTT TTCCTTATTT GCCAGCGGTT TAAGCCGGGA ACTTTAAGGA TACTGCCAGT

1081  
Cultures\_con GACAAACTGG AGGAAAAGG GGGACGACG TCAAGTCATC ATGGCCCTTA CGACCAGGGC  
Psychrobacter\_faecalis GACAAACTGG AGG--AAGG GGGACGACG TCAAGTCATC ATGGCCCTTA CGACCAGGGC  
Moraxella\_osloensis GACAAACTGG AGG--AAGG GGGACGACG TCAAGTCATC ATGGCCCTTA CGACCAGGGC

1141  
Cultures\_con TACACACGTG CTACAATGGT AGGTACAGAG GGCAGCTACA CAGCGATGTG ATGCGAATCT  
Psychrobacter\_faecalis TACACACGTG CTACAATGGT AGGTACAGAG GGCAGCTACA CAGCGATGTG ATGCGAATCT  
Moraxella\_osloensis TACACACGTG CTACAATGGT AGGTACAGAG GGTGCTACA CAGCGATGTG ATGCTAATCT

1201  
Cultures\_con CAAAAAGCCT ATCGTAGTCC AGATTGGAGT CTGCAACTCG ACTCCATGAA GTAGGAATCG  
Psychrobacter\_faecalis CAAAAAGCCT ATCGTAGTCC AGATTGGAGT CTGCAACTCG ACTCCATGAA GTAGGAATCG  
Moraxella\_osloensis CAAAAAGCCT ATCGTAGTCC GGATTGGAGT CTGCAACTCG ACTCCATGAA GTCGGAATCG

1261  
Cultures\_con CTAGTAATCG CGGATCAGAA TGCCGCGGTG AATACGTTCC CGGGCCTTGT ACACACCGCC  
Psychrobacter\_faecalis CTAGTAATCG CGGATCAGAA TGCCGCGGTG AATACGTTCC CGGGCCTTGT ACACACCGCC  
Moraxella\_osloensis CTAGTAATCG CGGATCAGAA TGCCGCGGTG AATACGTTCC CGGGCCTTGT ACACACCGCC

1321  
Cultures\_con CGTCACACCA TGGGAGTTGA TTGCACCAGA AGTGGGTAGC CTAAC  
Psychrobacter\_faecalis CGTCACACCA TGGGAGTTGA TTGCACCAGA AGTGGGTAGC CTAAC  
Moraxella\_osloensis CGTCACACCA TGGGAGTCTA TTGCACCAGA AGTGGGTAGC CTAAC
